# Supplementary material for: Self-assembly of a giant molybdenum titanium-oxo cluster [Mo 42 Ti 12 (O 2 ) 24 ] for bifunctional oxidation catalysis
Source: Royal Society of Chemistry journal article supplement (doi:10.1039/d4qi01795a), 2024-01-01
Supplement: d4qi01795a1.pdf [file d4qi01795a1.pdf]

## Supporting information

### **Self-Assembly of a Giant Molybdenum Titanium-oxo Cluster [Mo<sub>42</sub>Ti<sub>12</sub>(O<sub>2</sub>)<sub>24</sub>] for Bifunctional Oxidation Catalysis**

Ming Xu,<sup>a</sup> Ting Wang,<sup>\*a</sup> Wenjing Zhang,<sup>a</sup> Keke Guo,<sup>b</sup> Ping Wang,<sup>a</sup> Chao Qin,<sup>b</sup> Lin Xu,<sup>b</sup> Zhongmin Su,<sup>b</sup> and Xinlong Wang<sup>\*b</sup>

<sup>a</sup> Key Laboratory of Functional Materials Physics and Chemistry of the Ministry of Education, Jilin Normal University, Changchun, Jilin 130103

<sup>b</sup> Key Laboratory of Polyoxometalate and Reticular Material Chemistry of Ministry of Education Northeast Normal University, Changchun, Jilin 130024

\*Corresponding Authors: wangt@jlnu.edu.cn; wangxl824@nenu.edu.cn

### **Contents**

**Section S1 Experimental Methods**

**Section S2 Supplementary Figures**

**Section S3 Supplementary Tables**

**Section S4 References**

## Section S1 Experimental Methods

### 1.1 Materials and General Methods

All commercially obtained reagents, including  $(\text{NH}_4)_6\text{Mo}_7\text{O}_{24}\cdot 4\text{H}_2\text{O}$ ,  $\text{TiCl}_4$ ,  $\text{H}_2\text{O}_2$ ,  $\text{KOH}$ , and  $\text{HCl}$  were purchased from Aldrich and used without further purification. Elemental analyses (Ti, Mo, K) were performed on a PLASMA-SPEC (I) ICP atomic emission spectrometer. Thermogravimetric analysis (TGA) of the samples was performed using a Perkin-Elmer TG-7 analyzer heated from room temperature to 800 °C under nitrogen at the heating rate of 10 °C  $\text{min}^{-1}$ . FT/IR spectrum was performed in the range 4000-400  $\text{cm}^{-1}$  using KBr pellets on an Alpha Centaur FT/IR spectrophotometer. The surface photovoltage (SPV) spectroscopy was carried out on a lab-made instrument, which constitutes a source of monochromatic light, a lock-in amplifier (SR830-DSP) with a light chopper (SR540). Diffuse reflectance UV-vis spectra were measured from 200 to 600 nm on a Varian Cary 500 UV-vis NIR spectrometer equipped with a 110 mm diameter integrating sphere at room temperature. A barium sulfate ( $\text{BaSO}_4$ ) pellet was used as the standard with 100% reflectance. Energy dispersive X-ray (EDX) spectra and elemental mapping were obtained from a JEOL JSM 4800 F scanning electron microscope. The photocurrent ( $I-t$ ) and Mott-Schottky curves were recorded in the CHI660c electrochemistry station with Xenon lamp as the light source under ambient conditions.

### 1.2 X-ray Crystallography

The data collections was performed on a Bruker D8-Venture diffractometer with a Turbo X-ray Source (Mo  $\text{K}\alpha$  radiation,  $\lambda = 0.71073 \text{ \AA}$ ) adopting the direct drive rotating anode technique and a CMOS detector at 173 K. The data frames were collected using the program APEX-3 and processed using the program SAINT routine in APEX-3. The structure was solved by direct method and refined by the full-matrix least-squares on  $F^2$  using the SHELXL-2014 program.<sup>1</sup> The diffused electron densities resulting from these residual solvent molecules were removed from the data set using the SQUEEZE<sup>2</sup> routine of PLATON<sup>3</sup> and refined further using the data generated. The restrained SIMU, SADI instructions were used to make the structures more reasonable. The formula unit was obtained through a combination of elemental analyses and thermogravimetric characterization. Deposition Number CSD: 2068105 contains the supplementary crystallographic data for this paper. These data are provided free of charge by the joint Cambridge Crystallographic Data Centre and Fachinformationszentrum Karlsruhe Access Structures service [www.ccdc.cam.ac.uk/structures](http://www.ccdc.cam.ac.uk/structures).

### 1.3 Bond valence sum (BVS) analysis:

The BVS values ( $V_i$ ) of titanium and molybdenum atoms in 1 were calculated using the following equation:<sup>4,5</sup>

$$V_i = \sum \exp\left(\frac{r_o - r_{ij}}{B}\right)$$

where  $r_o$  and  $r_{ij}$  are the bond valence parameter and the bond length between atoms  $i$  and  $j$ , respectively, while  $B$  is a constant value of 0.37  $\text{\AA}$ .

## Section S2 Supplementary Figures

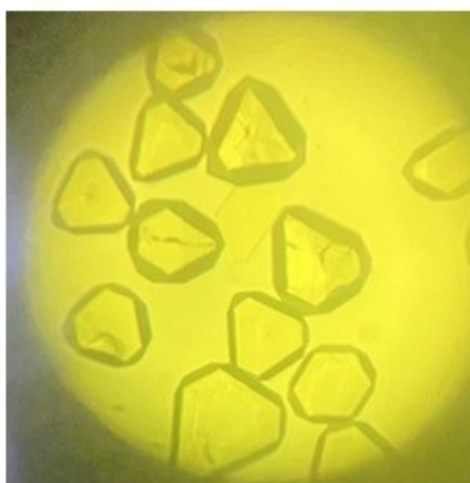

**Figure S1.** The crystal of **1** under an optical microscope.

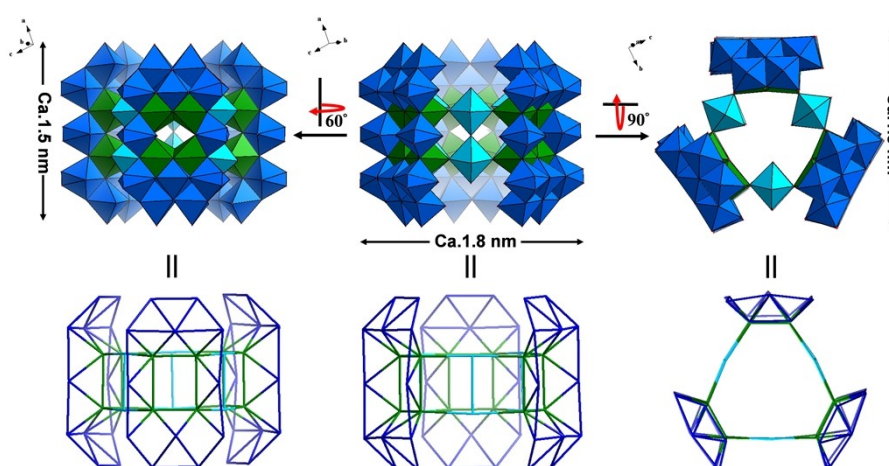

**Figure S2.** The polyhedron and metal-based skeleton conversions of **1** with different perspectives. Color codes: MoO<sub>6</sub>/MoO<sub>7</sub> polyhedra, blue/sky blue; TiO<sub>7</sub> polyhedra, green.

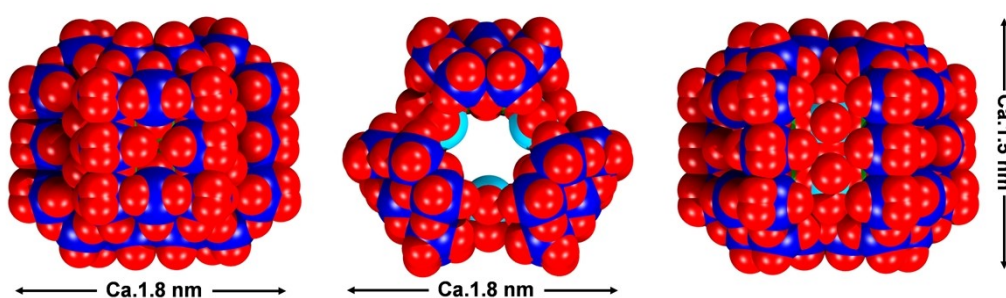

**Figure S3.** The structure of **1** viewed along with different perspectives in space-filling mode.

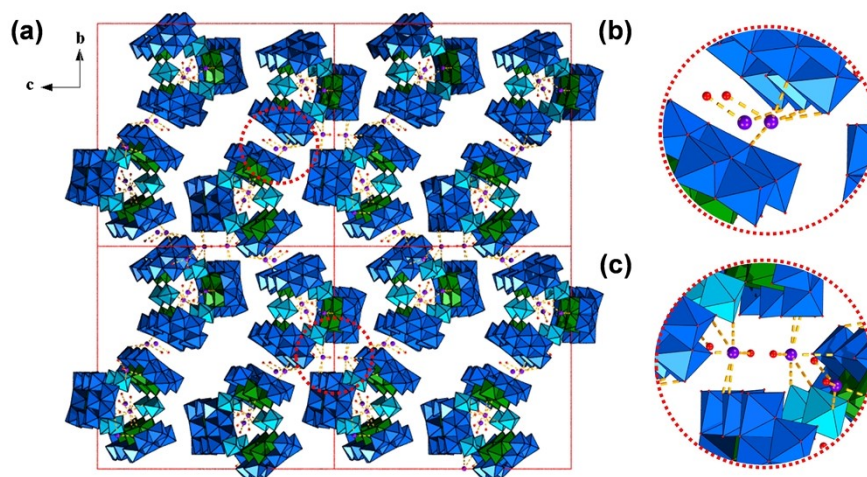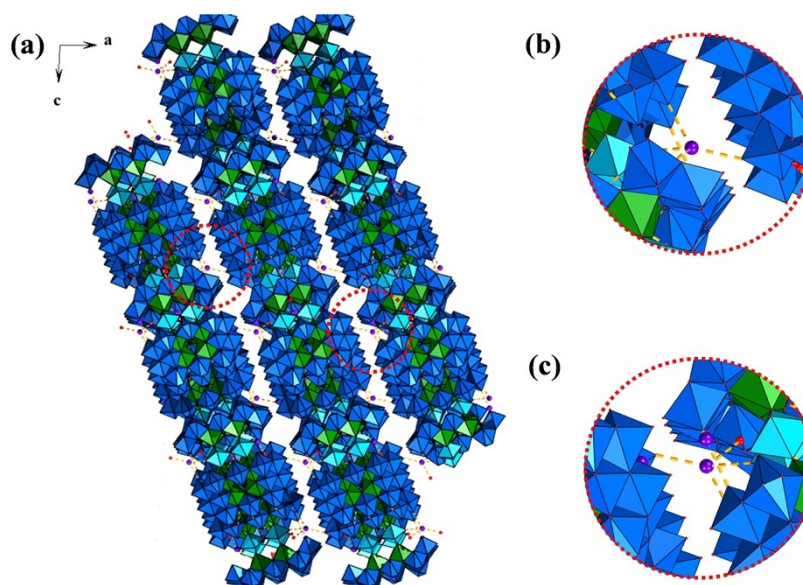

**Figure S4.** The three-dimensional supramolecular packing along the a-axis of 1.

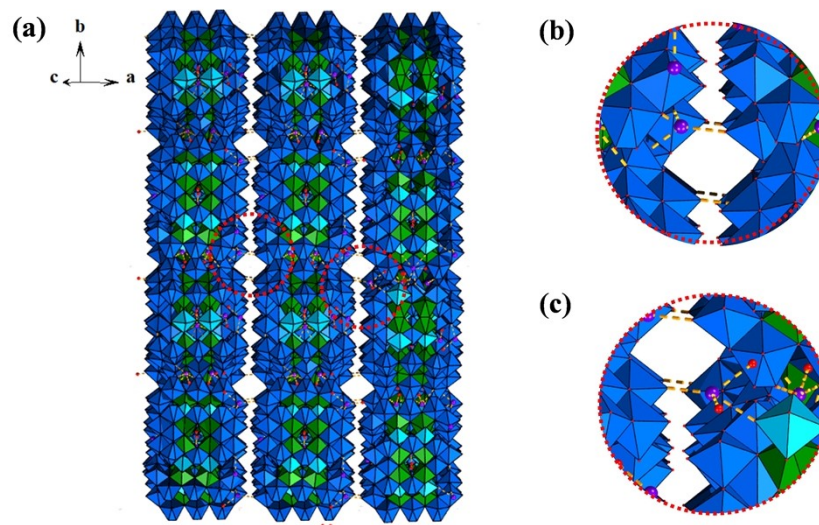

**Figure S5.** The three-dimensional supramolecular packing along the b-axis of 1.

**Figure S6.** The three-dimensional supramolecular packing along the c-axis of 1.

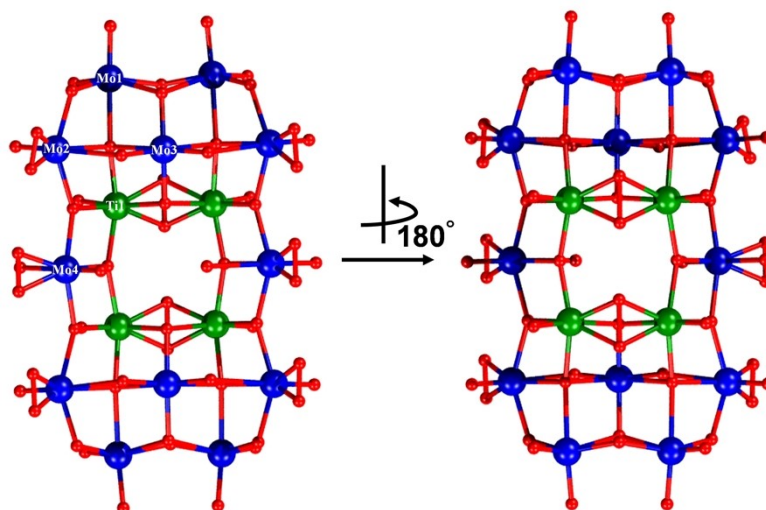

**Figure S7.** Ball-and-stick views of the  $\{\text{Mo}_{12}\text{Ti}_4\}$  building blocks with different perspectives. Color code: blue ball, Mo; green ball, Ti; red ball, O.

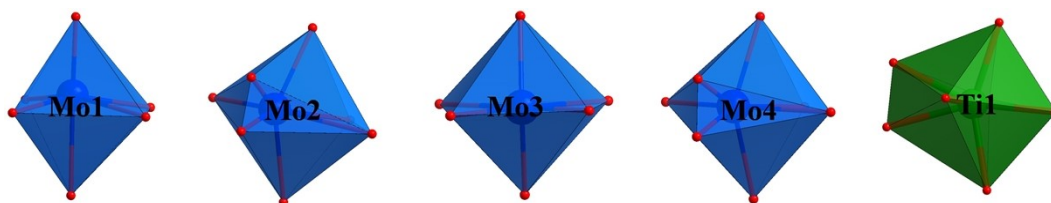

**Figure S8.** View of the detailed coordination configuration of Mo-O and Ti-O in polyhedron. Color codes: Mo-O polyhedra, blue; Ti-O polyhedra, green.

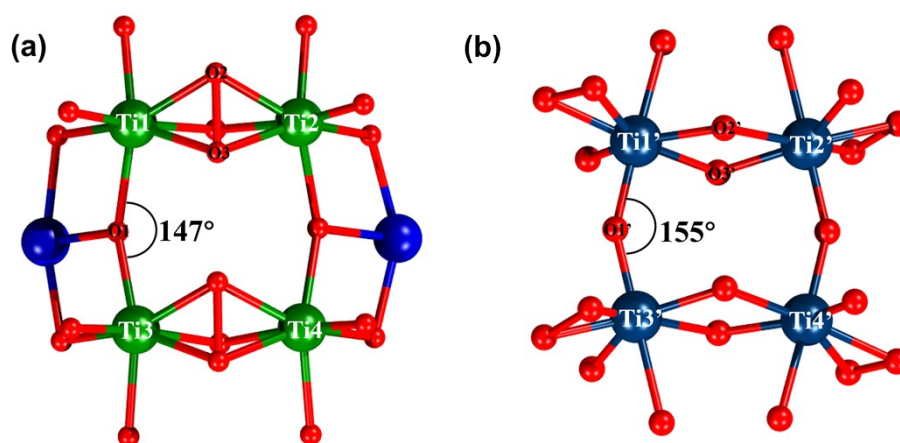

**Figure S9.** View of the different coordination modes of Ti ions in the reported (a) **1** and (b)  $\{\text{Ti}_4\text{-1}\}$ .



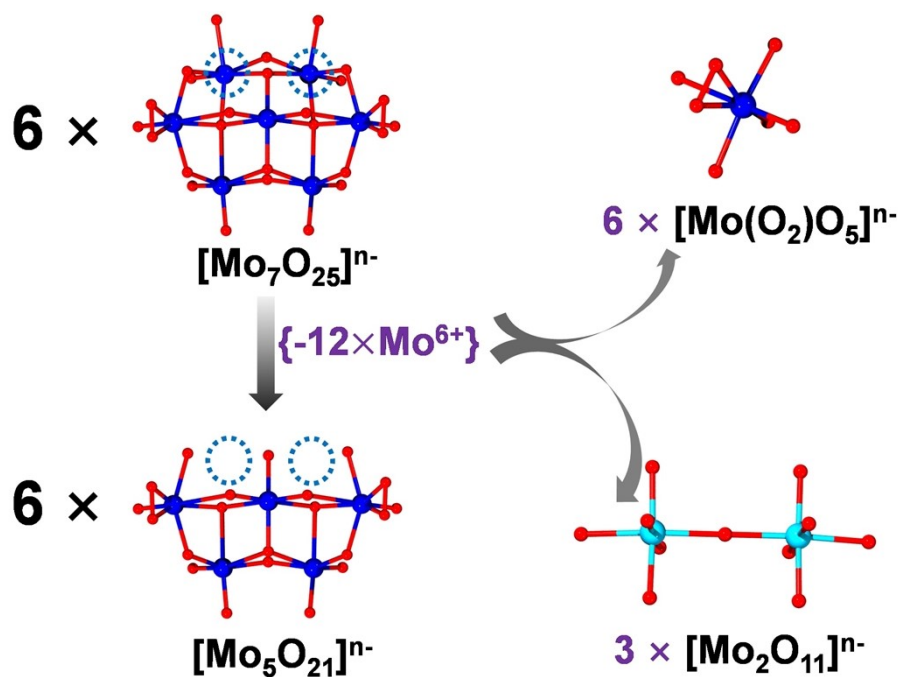

**Figure S10.** Ball-and-stick views of the  $[\text{Mo}_7\text{O}_{25}]^{n-}$  degraded into  $[\text{Mo}_5\text{O}_{21}]^{n-}$  building blocks. Color code: blue ball, Mo; green ball, Ti; red ball, O.

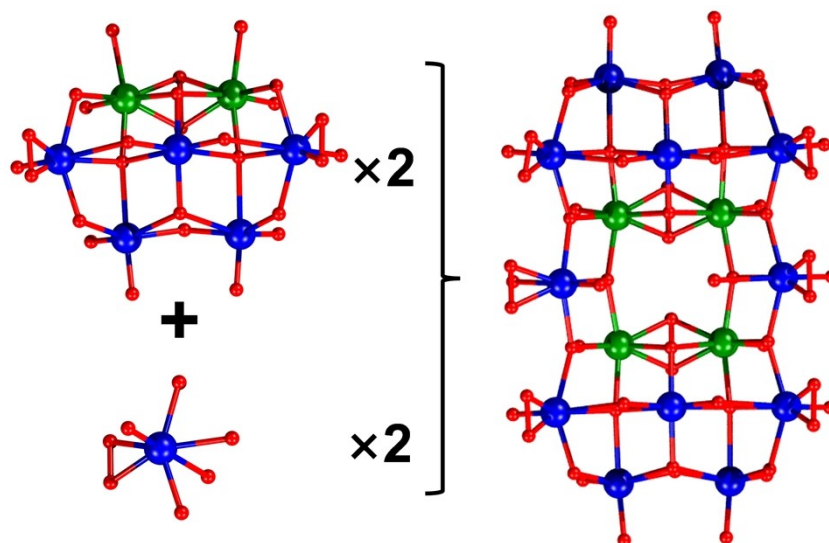

**Figure S11.** Ball-and-stick views of the formation of  $\{\text{Mo}_{12}\text{Ti}_4\}$ . Color code: blue ball, Mo; green ball, Ti; red ball, O.

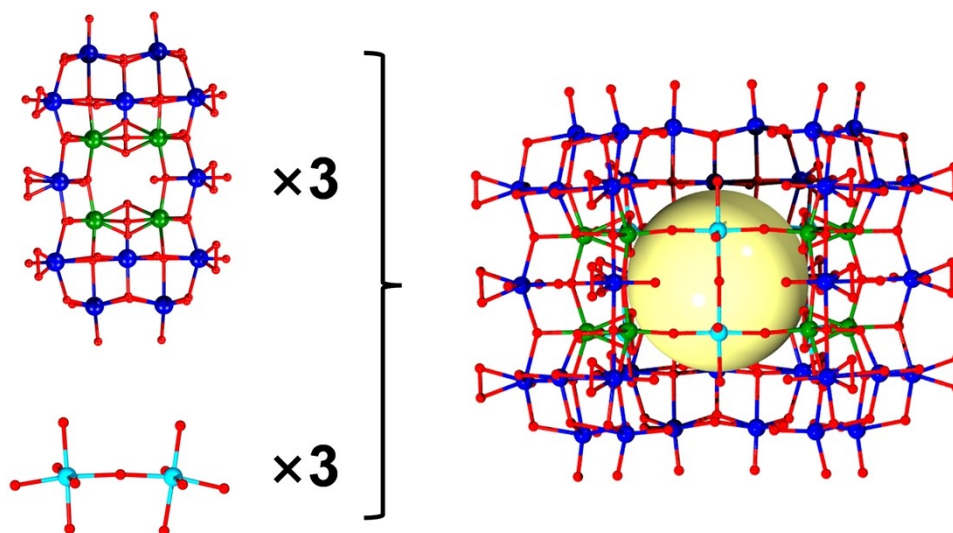

**Figure S12.** Ball-and-stick views of the formation of  $\{\text{Mo}_{42}\text{Ti}_{12}\}$ . Color codes: Color code: blue ball, Mo; green ball, Ti; red ball. O.

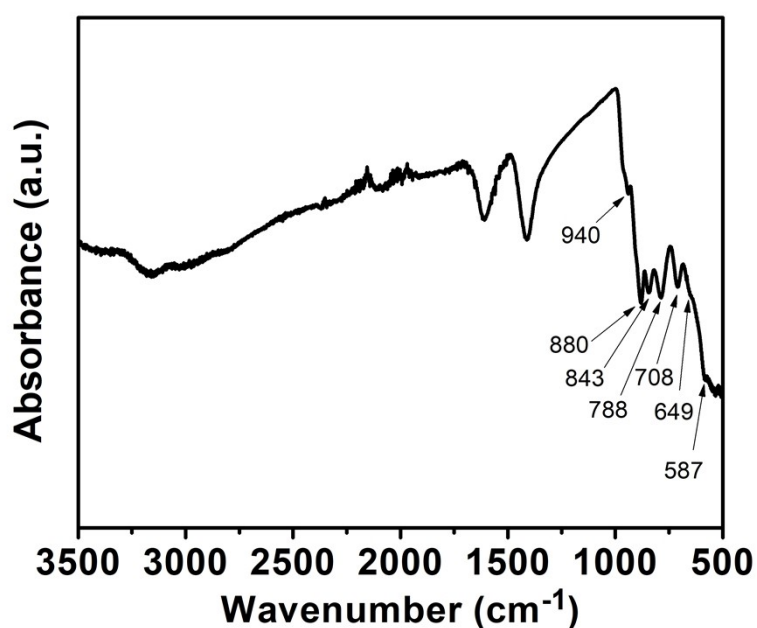

**Figure S13.** The FT-IR spectrum of **1**. The peaks at 940  $\text{cm}^{-1}$ , 843  $\text{cm}^{-1}$ , and 788  $\text{cm}^{-1}$  may be assigned to stretching vibrations of terminal Mo=O bands, antisymmetric stretching vibrations of Mo-O-Mo bridges, and bending vibrations of Mo-O-Mo bridges, respectively. The peaks at 708  $\text{cm}^{-1}$  and 649  $\text{cm}^{-1}$  are assigned to the bending vibrations of Ti-O-Ti bridges and there is also a tiny peak at about 587  $\text{cm}^{-1}$ , which is attributed to the presence of antisymmetric stretching vibrations Ti-O-Ti bridges.<sup>6-8</sup>

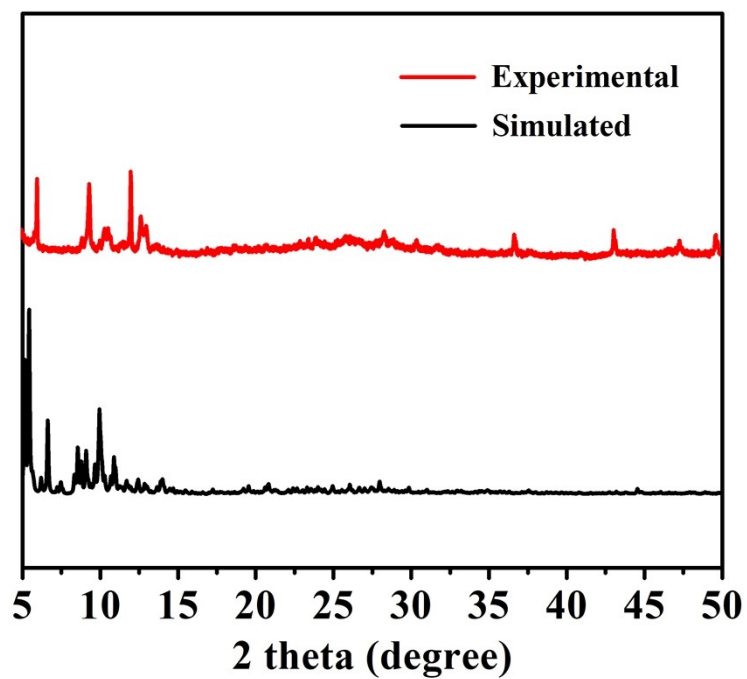

Figure S14. Simulated and experimental PXRD patterns of **1**.

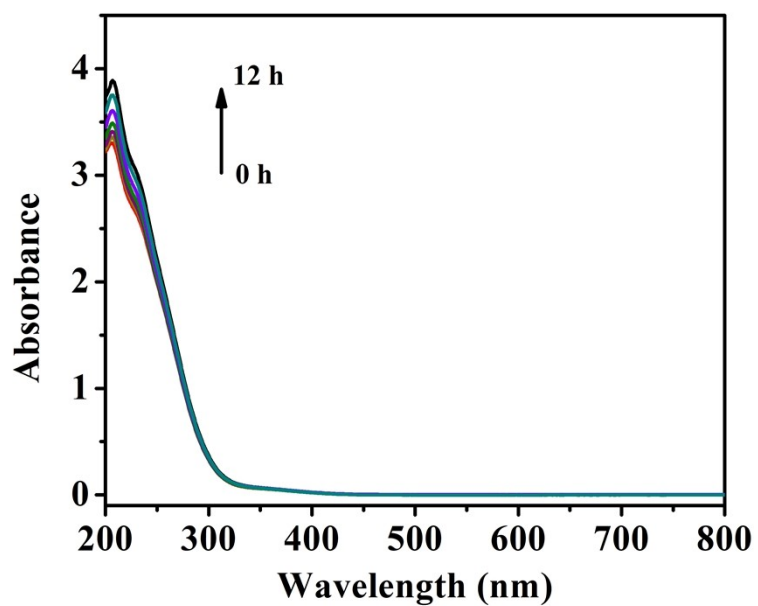

Figure S15. UV-vis absorption spectra of **1** in  $\text{H}_2\text{O}$ . UV-vis absorption spectra of **1** in aqueous solution exhibit consistent absorptions at about 206 nm, and their absorption profiles remain almost unchanged for 12 hours, confirming the good stability of **1** in  $\text{H}_2\text{O}$ .



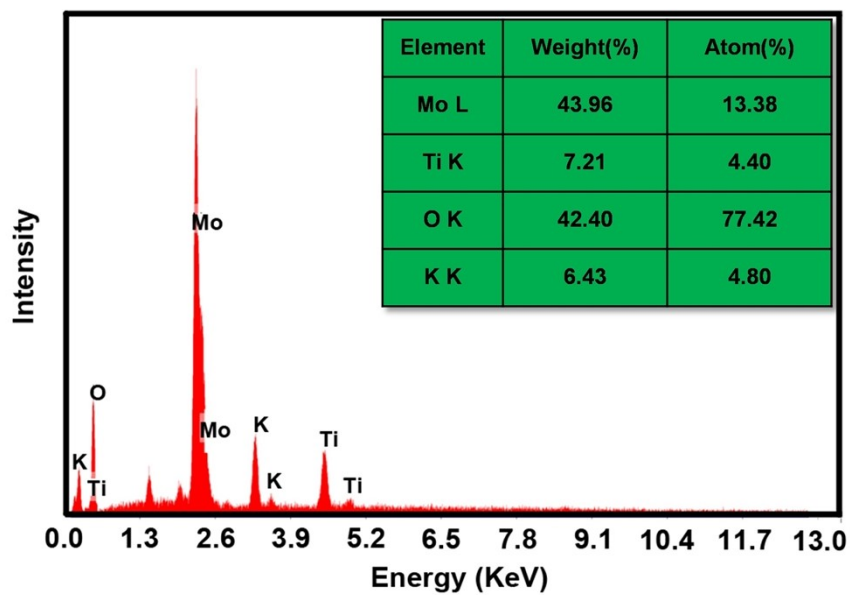

Figure S16. The EDX spectrum of 1. The Mo, Ti, O and K elements are contained in 1.

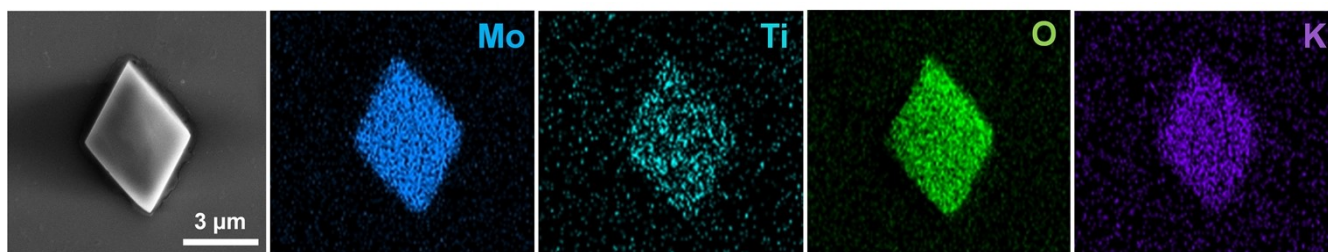

Figure S17. Elemental mapping of Mo, Ti, O and K in 1.

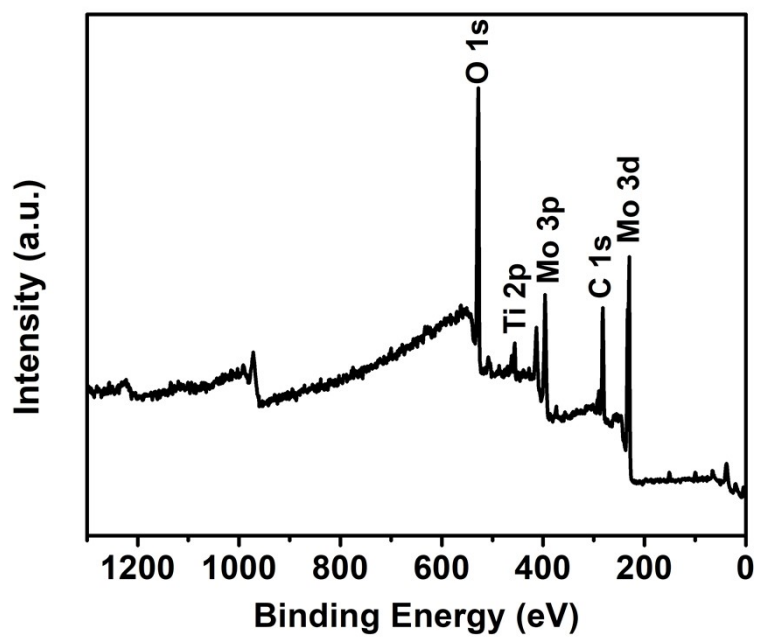

Figure S18. The full-scan X-ray photoelectron spectrum (XPS) spectra of 1.

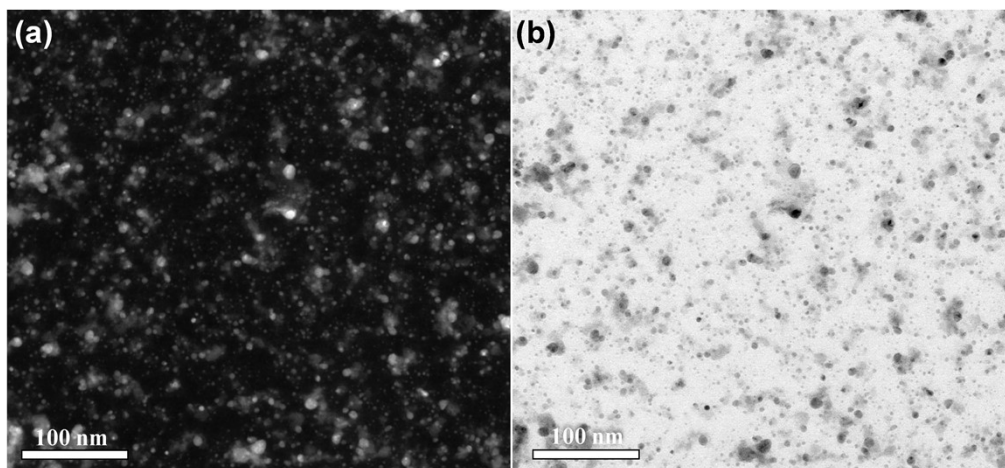

Figure S19. Dark-field STEM of **1**.

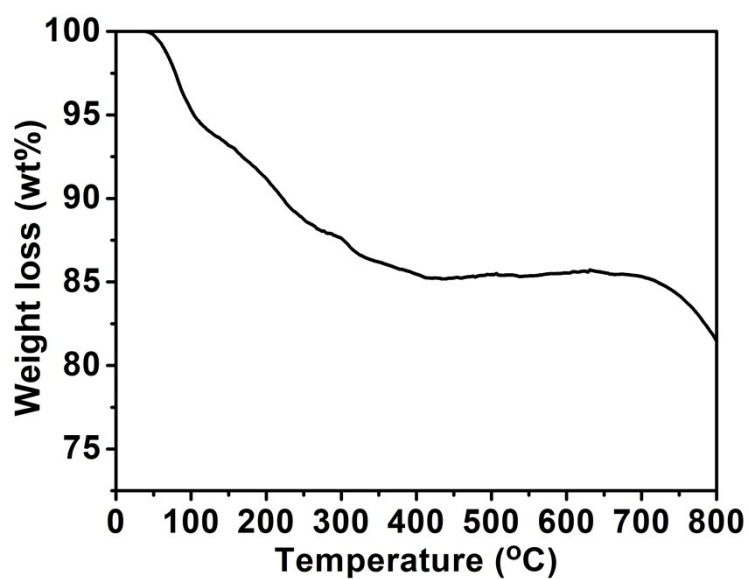

Figure S20. The TG curve of **1**. The TG curve exhibits that the weight loss of 6.9% at 25-150 °C and 5.3% at 150-278 °C correspond to the loss of crystalline water and coordination water in **1**, respectively, thus indicating the number of crystalline water in **1** is 31 and the structure of **1** can be maintained up to 275 °C.

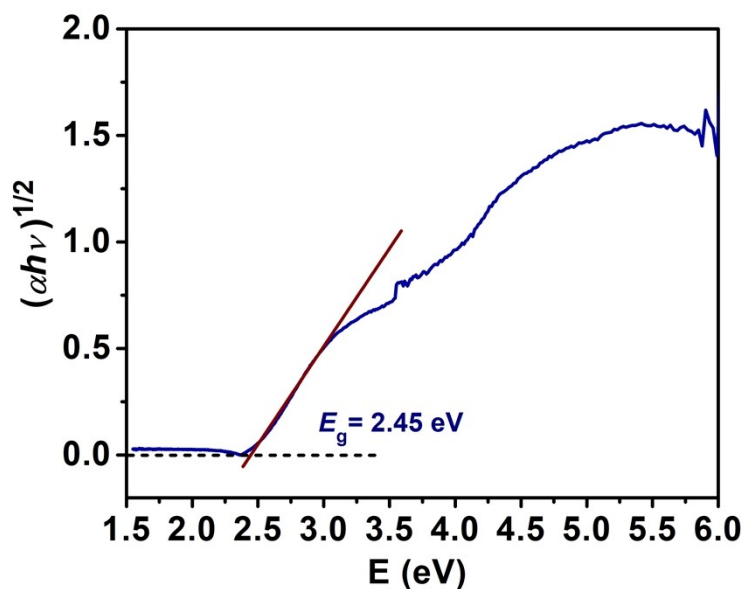

Figure S21. The plot of the Tauc's plot of the absorption spectra of 1.

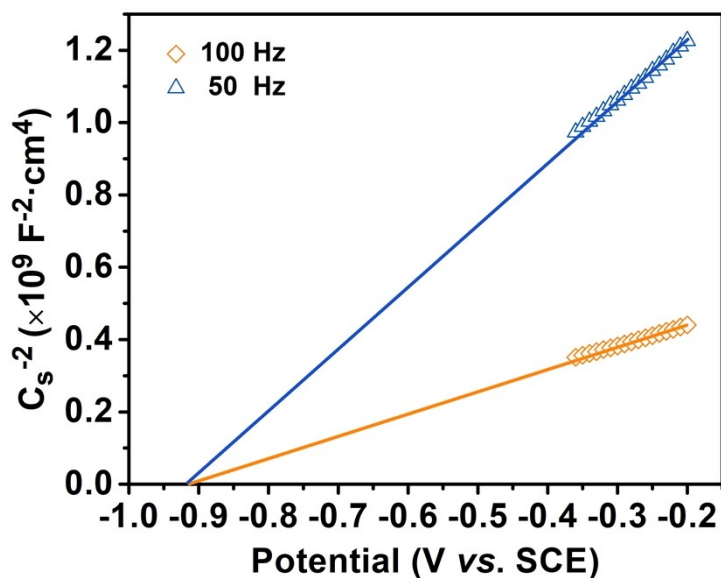

Figure S22. The Mott-Schottky curves of 1. The Mott-Schottky curves show that the slopes in the linear region are positive, which indicates that 1 is an n-type semiconductor.

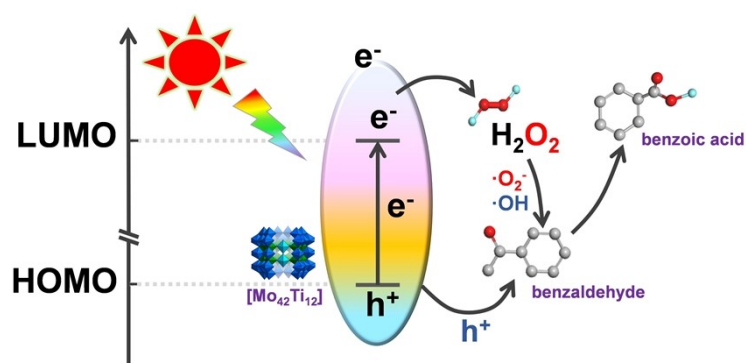

Figure S23. The reaction mechanism of photocatalytic benzaldehyde.

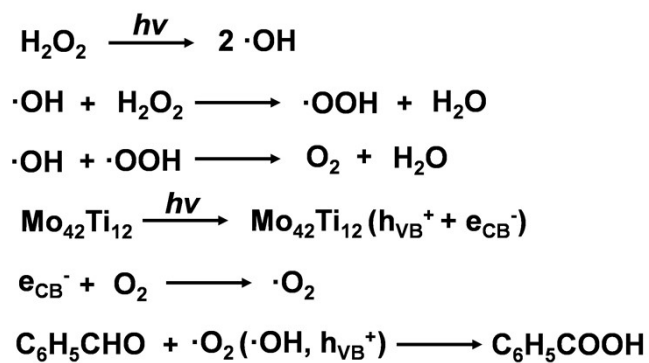

Figure S24. The reaction mechanism of photocatalytic benzaldehyde.

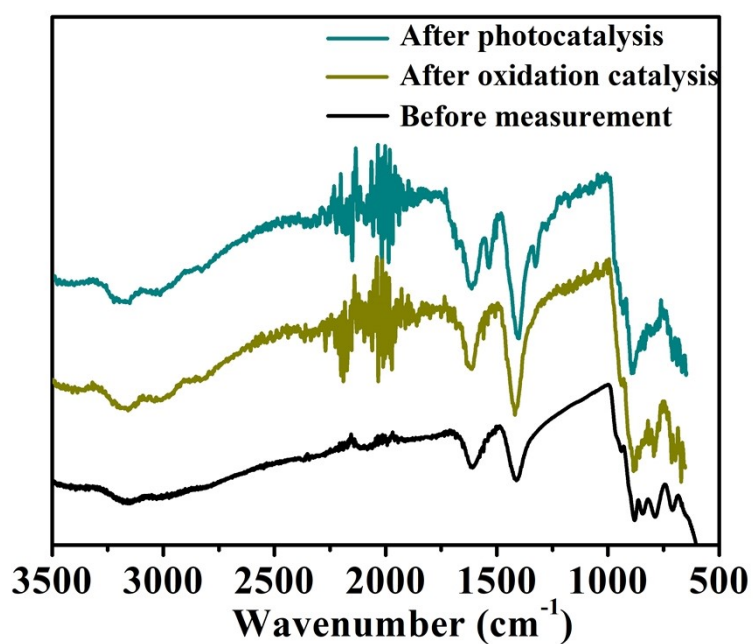

Figure S25. The FT-IR spectra of 1 before and after catalytic reaction.

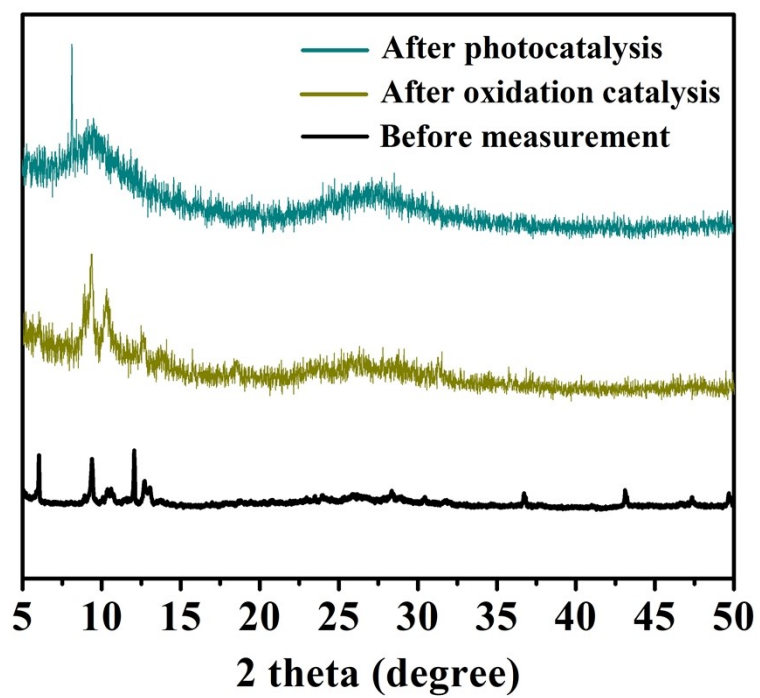

**Figure S26.** The XRD patterns of **1** before and after catalytic reaction.



## Section S3 Supplementary Tables

**Table S1.** Collected Examples of molybdenum titanium-oxo clusters.

| Compounds                                                                                                                                                | MoTi                           | Nuclearity | Ref.      |
|----------------------------------------------------------------------------------------------------------------------------------------------------------|--------------------------------|------------|-----------|
| $[\text{K}_8(\text{H}_2\text{O})_8][\text{Ti}_{12}(\text{O}_2)_6(\text{OH})_{12}\text{Mo}_{42}\text{O}_{124}(\text{O}_2)_{18}(\text{H}_2\text{O})_{17}]$ | $\text{Mo}_{42}\text{Ti}_{12}$ | 54         | this work |
| $[\text{Mo}_2\text{Ti}_2\text{O}_4(\text{OMe})_6(\text{O}^i\text{Pr})_6]$                                                                                | $\text{Mo}_2\text{Ti}_2$       | 4          | 9         |
| $[\text{Mo}_6\text{Ti}_6\text{O}_{22}(\text{O}^i\text{Pr})_{16}(\text{iPrOH})_2]$                                                                        | $\text{Mo}_6\text{Ti}_6$       | 12         | 9         |
| $[(\text{n-C}_4\text{H}_9)_4\text{N}]_2[\text{HCp}^*\text{TiMo}_5\text{O}_{18}]$                                                                         | $\text{Mo}_5\text{Ti}$         | 6          | 10        |
| $[\text{Mo}_4\text{Ti}_4\text{O}_{10}(\text{OEt})_6(\text{O}^i\text{Pr})_8(\text{BA})_2]$                                                                | $\text{Mo}_4\text{Ti}_4$       | 8          | 11        |
| $[\text{H}_2\text{Mo}_4\text{Ti}_4(\mu_2\text{-O})_6(\mu_3\text{-O})_4\text{Bz}_{10}]$                                                                   | $\text{Mo}_4\text{Ti}_4$       | 8          | 11        |
| $[\text{H}_2\text{Mo}_4\text{Ti}_6(\mu_2\text{-O})_6(\mu_3\text{-O})_4\text{Bz}_{14}(\text{O}^i\text{Pr})_4]$                                            | $\text{Mo}_4\text{Ti}_6$       | 10         | 12        |
| $[\text{Mo}^{\text{V}}_4\text{Ti}^{\text{IV}}_4\text{O}_{10}(\text{OC}_2\text{H}_5)_{14}(\text{C}_6\text{H}_5\text{COO})_2]$                             | $\text{Mo}_4\text{Ti}_4$       | 8          | 13        |
| $[\text{Mo}^{\text{V}}_4\text{Mo}^{\text{VI}}_2\text{Ti}^{\text{IV}}_4\text{O}_{16}(\text{OCH}_3)_{16}]$                                                 | $\text{Mo}_6\text{Ti}_4$       | 10         | 13        |
| $[\{\text{Mo}_2\text{Ti}_4\text{O}_8(\text{OEt})_{10}\}_2]$                                                                                              | $\text{Mo}_4\text{Ti}_8$       | 12         | 14        |

**Table S2.** Collected Examples of polyoxometalates build up by lacunary building blocks.

| Lacunary building blocks                              | Compounds                                                                                                                                                                                           | Ref.                                                                   |
|-------------------------------------------------------|-----------------------------------------------------------------------------------------------------------------------------------------------------------------------------------------------------|------------------------------------------------------------------------|
| $[\text{Mo}_5(\text{O}_2)_2\text{O}_{17}]^{8-}$       | $[\text{Mo}_{42}\text{O}_{124}(\text{O}_2)_{18}\text{Ti}_{12}(\text{O}_2)_6(\text{OH})_{12}(\text{H}_2\text{O})_{17}]^{8-}$                                                                         | <b>This work</b>                                                       |
| $[\text{PMo}_9\text{O}_{34}]^{9-}$                    | $[\{\text{PMo}_9\text{O}_{34}\text{TiO}\}_2]^{14-}$                                                                                                                                                 | <i>Chem. Commun.</i> , 2020, <b>56</b> , 1097-1100 (Our previous work) |
| $[\text{SiW}_9\text{O}_{34}]^{10-}$                   | $\text{Ag}_{14}(\text{DPPB})_4(\text{CH}_3\text{CN})_9[\text{Ag}_{24}(\text{Si}_2\text{W}_{18}\text{O}_{66})_3]^{20-}$                                                                              | <i>Angew. Chem. Int. Ed.</i> , 2024, <b>63</b> , e202317341            |
| $[\text{B-}\alpha\text{-SbW}_9\text{O}_{33}]^{9-}$    | $[\text{Sb}_{15}\text{Tb}_7\text{W}_3\text{O}_{29}(\text{OH})_3(\text{DMF})(\text{H}_2\text{O})_6(\text{SbW}_8\text{O}_{30})(\text{SbW}_9\text{O}_{33})_5]^{27-}$                                   | <i>Angew. Chem. Int. Ed.</i> , 2022, <b>61</b> , e202210019            |
| $[\text{A-}\alpha\text{-PW}_9\text{O}_{34}]^{9-}$     | $[\{\{\text{B-}\alpha\text{-PW}_9\text{O}_{34}\}\text{Co}_3(\text{OH})(\text{H}_2\text{O})_2(\text{O}_3\text{PC}(\text{O})(\text{C}_3\text{H}_6\text{NH}_3)\text{PO}_3)\}_2\text{Co}]^{14-}$        | <i>Angew. Chem. Int. Ed.</i> , 2023, <b>62</b> , e202303290            |
| $[\text{A-}\alpha\text{-PMo}_9\text{O}_{34}]^{9-}$    | $[\text{A-}\alpha\text{-PMo}_9\text{O}_{31}(\text{py})_3]^{3-}$                                                                                                                                     | <i>Angew. Chem. Int. Ed.</i> , 2021, <b>60</b> , 6960-6964             |
| $[\text{SiW}_9\text{O}_{34}]^{10-}$                   | $[\text{Ag}_7(\text{Si}_3\text{W}_{27}\text{O}_{96})]^{13-}$                                                                                                                                        | <i>Angew. Chem. Int. Ed.</i> , 2020, <b>59</b> , 16361-16365           |
| $[\text{P}_2\text{W}_{17}\text{O}_{61}]^{10-}$        | $[\text{P}_2\text{W}_{17}\text{O}_{57}(\text{PO}_3\text{C}_2\text{H}_4\text{N}_3)(\text{PO}_4\text{C}_2\text{H}_4)]^{10-}$                                                                          | <i>Angew. Chem. Int. Ed.</i> , 2019, <b>58</b> , 18281-18285           |
| $[\text{Nb}_7\text{O}_{22}]^{9-}$                     | $[\text{Nb}_{24}\text{O}_{72}\text{H}_8]^{16-}$                                                                                                                                                     | <i>J. Am. Chem. Soc.</i> , 2018, <b>140</b> , <b>34</b> , 10803-10813  |
| $[\alpha\text{-P}_2\text{W}_{15}\text{O}_{56}]^{12-}$ | $[\text{Co}^{\text{II}}_9(\text{H}_2\text{O})_6(\text{OH})_3(\text{p-RC}_6\text{H}_4\text{As}^{\text{V}}\text{O}_3)_2(\alpha\text{-P}^{\text{V}}_2\text{W}^{\text{VI}}_{15}\text{O}_{56})_3]^{25-}$ | <i>J. Am. Chem. Soc.</i> , 2017, <b>139</b> , 14501-14510              |
| $[\text{P}_2\text{W}_{12}\text{O}_{48}]^{14-}$        | $[\{\gamma\text{-P}_2\text{W}_{12}\text{O}_{48}\text{Mn}_4(\text{acac})_2(\text{OAc})\}_6]^{42-}$                                                                                                   | <i>Angew. Chem. Int. Ed.</i> , 2016, <b>55</b> , 9630-9633             |
| $[\text{A-}\alpha\text{-GeW}_9\text{O}_{34}]^{10-}$   | $[\text{Zr}_{24}\text{O}_{22}(\text{OH})_{10}(\text{H}_2\text{O})_2(\text{W}_2\text{O}_{10}\text{H})_2(\text{GeW}_9\text{O}_{34})_4(\text{GeW}_8\text{O}_{31})_2]^{32-}$                            | <i>J. Am. Chem. Soc.</i> , 2014, <b>136</b> , 7637-7642                |

|                                              |                                                                                                                                |                                                                    |
|----------------------------------------------|--------------------------------------------------------------------------------------------------------------------------------|--------------------------------------------------------------------|
| $[\gamma\text{-SiW}_{10}\text{O}_{36}]^{8-}$ | $[\{\text{Zn}(\text{OH}_2)(\mu_3\text{-OH})\}_2\{\text{Zn}(\text{OH}_2)_2\}_2\{\gamma\text{-HSiW}_{10}\text{O}_{36}\}_2]^{8-}$ | <i>Angew. Chem. Int. Ed.</i> , 2010, <b>49</b> , 6096-6100         |
| $[\alpha\text{-PW}_{11}\text{O}_{39}]^{7-}$  | $[\{(\alpha\text{-PW}_{11}\text{O}_{39}\text{H})\text{Ln}(\text{H}_2\text{O})_3\}_2]^{6-}$                                     | <i>Cryst. Growth Des.</i> , 2009, <b>9</b> , <b>10</b> , 4362-4372 |

**Table S3:** Crystal data and structure refinement for **1**.

|                                                |                                                                     |
|------------------------------------------------|---------------------------------------------------------------------|
| Empirical formula                              | $\text{Mo}_{42}\text{K}_8\text{O}_{209}\text{Ti}_{12}\text{H}_{62}$ |
| Mr (g mol <sup>-1</sup> )                      | 8323.57                                                             |
| Crystal system                                 | monoclinic                                                          |
| Space group                                    | P21/n                                                               |
| a/Å                                            | 17.3790(9)                                                          |
| b/Å                                            | 36.587(2)                                                           |
| c/Å                                            | 39.015(2)                                                           |
| $\alpha/^\circ$                                | 90                                                                  |
| $\beta/^\circ$                                 | 93.9210(10)                                                         |
| $\gamma/^\circ$                                | 90                                                                  |
| Volume/Å <sup>3</sup>                          | 24750(2)                                                            |
| Z                                              | 4                                                                   |
| $\rho_{\text{calc}}/\text{cm}^3$               | 2.234                                                               |
| $\mu/\text{mm}^{-1}$                           | 2.643                                                               |
| F(000)                                         | 15565.0                                                             |
| Radiation                                      | Mo K $\alpha$ ( $\lambda = 0.71073$ )                               |
| 2 $\Theta$ range for data collection/ $^\circ$ | 2.742 to 50.078                                                     |
| Independent reflections                        | 43613 [R <sub>int</sub> = 0.0727, R <sub>sigma</sub> = 0.0796]      |
| Goodness-of-fit on F <sup>2</sup>              | 1.019                                                               |
| Final R indexes [ $I \geq 2\sigma(I)$ ]        | R <sub>1a</sub> = 0.0811, wR <sub>2b</sub> = 0.2008                 |
| Final R indexes [all data]                     | R <sub>1</sub> = 0.1369, wR <sub>2</sub> = 0.2381                   |

$${}^a R_1 = \sum ||F_o| - |F_c|| / \sum |F_o|, {}^b wR_2 = \{ \sum \omega [(F_o)^2 - (F_c)^2]^2 / \sum \omega [(F_o)_2]^2 \}^{1/2}.$$

**Table S4:** BVS values for Mo atoms in **1**.

| Molybdenum atom | BVS    | Assigned Oxidation States |
|-----------------|--------|---------------------------|
|                 | Mo(VI) |                           |
| Mo1             | 6.054  | VI                        |
| Mo2             | 6.064  | VI                        |
| Mo3             | 6.077  | VI                        |
| Mo4             | 5.903  | VI                        |
| Mo5             | 6.156  | VI                        |
| Mo6             | 5.550  | VI                        |
| Mo7             | 5.598  | VI                        |
| Mo8             | 5.776  | VI                        |
| Mo9             | 5.411  | VI                        |
| Mo10            | 6.030  | VI                        |
| Mo11            | 5.720  | VI                        |
| Mo12            | 5.716  | VI                        |
| Mo13            | 5.450  | VI                        |
| Mo14            | 5.552  | VI                        |
| Mo15            | 5.687  | VI                        |
| Mo16            | 6.074  | VI                        |
| Mo17            | 6.413  | VI                        |
| Mo18            | 5.486  | VI                        |
| Mo19            | 6.085  | VI                        |
| Mo20            | 6.033  | VI                        |
| Mo21            | 6.147  | VI                        |
| Mo22            | 5.937  | VI                        |
| Mo23            | 6.089  | VI                        |
| Mo24            | 5.472  | VI                        |
| Mo25            | 6.098  | VI                        |
| Mo26            | 5.729  | VI                        |
| Mo27            | 5.674  | VI                        |
| Mo28            | 5.659  | VI                        |
| Mo29            | 6.152  | VI                        |
| Mo30            | 6.308  | VI                        |
| Mo31            | 5.772  | VI                        |
| Mo32            | 5.370  | VI                        |
| Mo33            | 5.682  | VI                        |
| Mo34            | 6.188  | VI                        |
| Mo35            | 6.287  | VI                        |
| Mo36            | 6.270  | VI                        |
| Mo37            | 6.086  | VI                        |
| Mo38            | 5.924  | VI                        |

|      |       |    |
|------|-------|----|
| Mo39 | 6.355 | VI |
| Mo40 | 5.588 | VI |
| Mo41 | 5.528 | VI |
| Mo42 | 5.550 | VI |

**Table S5:** BVS caculations for the Ti sites in **1**.

| Titanium atom | BVS    | Assigned Oxidation States |
|---------------|--------|---------------------------|
|               | Ti(IV) |                           |
| Ti1           | 4.130  | IV                        |
| Ti2           | 4.430  | IV                        |
| Ti3           | 4.439  | IV                        |
| Ti4           | 4.400  | IV                        |
| Ti5           | 4.337  | IV                        |
| Ti6           | 4.340  | IV                        |
| Ti7           | 4.429  | IV                        |
| Ti8           | 4.389  | IV                        |
| Ti9           | 4.474  | IV                        |
| Ti10          | 4.309  | IV                        |
| Ti11          | 4.426  | IV                        |
| Ti12          | 4.455  | IV                        |

**Table S6:** Effect of time on the oxidative of benzyl alcohol.<sup>[a]</sup>

| Catalysts | Substrate                                                                           | T (°C) | Reaction time (h) | Conversions (%) <sup>[b]</sup> | Selectivities (%) <sup>[b]</sup> |
|-----------|-------------------------------------------------------------------------------------|--------|-------------------|--------------------------------|----------------------------------|
| 1         | 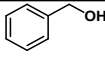 | 65     | 12                | 99                             | 91.5                             |
| 1         |  | 65     | 24                | 99                             | 96.4                             |
| 1         |  | 65     | 36                | 99                             | 96.8                             |
| 1         |  | 65     | 48                | 99                             | 90.1                             |
| 1         |  | 65     | 60                | 99                             | 92.1                             |

[a] Reaction conditions: Mo<sub>42</sub>Ti<sub>12</sub> (**1**) (3.0 mol%), benzyl alcohol (0.21 mmol), H<sub>2</sub>O<sub>2</sub> (1.63 mmol), H<sub>2</sub>O (3 mL), T (65 °C).

[b] Conversion and Selectivity were calculated from gas chromatography.

**Table S7:** Recycling experiments of catalyst.<sup>[a]</sup>

| Catalysts | Substrate                                                                         | T (°C) | Reaction time (h) | Run time | Conversions (%) <sup>[b]</sup> | Selectivities (%) <sup>[b]</sup> |
|-----------|-----------------------------------------------------------------------------------|--------|-------------------|----------|--------------------------------|----------------------------------|
| 1         | 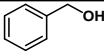 | 65     | 24                | 1        | 99                             | 96.4                             |
| 1         |  | 65     | 24                | 2        | 99                             | 95.9                             |
| 1         |  | 65     | 24                | 3        | 99                             | 94.5                             |
| 1         |  | 65     | 24                | 4        | 99                             | 93.6                             |
| 1         |  | 65     | 24                | 5        | 99                             | 92.2                             |

[a] Reaction conditions: Mo<sub>42</sub>Ti<sub>12</sub> (**1**) (3.0 mol%), benzyl alcohol (0.21 mmol), H<sub>2</sub>O<sub>2</sub> (1.63 mmol), H<sub>2</sub>O (3 mL), T (65 °C), t (24 h).

[b] Conversion and Selectivity were calculated from gas chromatography.

**Table S8.** A comparison of the oxidation of benzyl alcohol of **1** and those of some other representative POM, POM-based materials.

| Catalyst                                                                                                           | substrate    | Oxidant                       | solvent                         | Light      | T(°C) | t/h   | Conv. (%)     | BAD Sel.(%)   | BZA Sel.(%) | Ref.      |
|--------------------------------------------------------------------------------------------------------------------|--------------|-------------------------------|---------------------------------|------------|-------|-------|---------------|---------------|-------------|-----------|
| Mo <sub>42</sub> Ti <sub>12</sub> (50mg)                                                                           | BA (0.2mmol) | H <sub>2</sub> O <sub>2</sub> | H <sub>2</sub> O                | no         | 65    | 12/24 | 99            | 91.5/96.4     | -           | This work |
| Mo <sub>42</sub> Ti <sub>12</sub> (5mg)                                                                            | BAD (1mmol)  | H <sub>2</sub> O <sub>2</sub> | H <sub>2</sub> O                | AM 1.5     | 55    | 12    | 92.6          | -             | >99         | This work |
| K <sub>4</sub> [SiW <sub>12</sub> O <sub>40</sub> ] (30mg)                                                         | BA (0.1mmol) | O <sub>2</sub>                | CH <sub>2</sub> Cl <sub>2</sub> | 365nm      | R.T   | 12    | 40±5          | 99±1          | -           | 15        |
| [Ag][Ag <sub>4</sub> L <sub>3</sub> ][SiW <sub>12</sub> O <sub>40</sub> ] (30mg)                                   | BA (0.1mmol) | O <sub>2</sub>                | CH <sub>2</sub> Cl <sub>2</sub> | 365nm      | R.T   | 12    | 99±1          | -             | 99±1        | 15        |
| Bi <sub>4</sub> Ti <sub>3</sub> O <sub>12</sub> (10mg)                                                             | BA (0.1mmol) | O <sub>2</sub>                | BTF                             | >360nm     | R.T   | 5     | 35.5±5<br>0.4 | 99.8 ±<br>0.1 | -           | 16        |
| [Ti <sub>19</sub> Bi <sub>2</sub> ] (100mg)                                                                        | BA (40umol)  | O <sub>2</sub>                | MeCN                            | AM 1.5     | R.T   | 12    | 100           | >99           | -           | 17        |
| TMADT(W <sub>10</sub> O <sub>32</sub> ) (0.012mmol)                                                                | BA (1mmol)   | O <sub>2</sub>                | MeCN                            | Vis        | 25    | 12    | 51.2          | 40.7          | 10.5        | 18        |
| [Cu <sub>1.5</sub> (DPNDI) <sub>1.5</sub> H <sub>1.5</sub> P <sub>2</sub> W <sub>18</sub> O <sub>62</sub> ] (10mg) | BA (0.5mmol) | H <sub>2</sub> O <sub>2</sub> | EtOH/H <sub>2</sub> O           | white LED  | R.T   | 16    | 75            | 99            | -           | 19        |
| PMo <sub>12</sub> -ZnIn <sub>2</sub> S <sub>4</sub> (5mg)                                                          | BA (0.2mmol) | Ar                            | H <sub>2</sub> O                | λ > 420 nm | R.T   | 5     | 96.1          | 98.2          | -           | 20        |
| [TBA-Q-Al] (20mg)                                                                                                  | BA (0.5mmol) | O <sub>2</sub>                | MeCN                            | 420-430nm  | R.T   | 24    | 100           | -             | >99         | 21        |
| [W <sub>10</sub> O <sub>32</sub> ][Cp <sub>3</sub> Zr <sub>3</sub> ] (1mol%)                                       | BA (0.2mmol) | O <sub>2</sub>                | BTF                             | 385nm      | R.T   | 12    | 97            | >99           | -           | 22        |



|                                                                                                                                                          |                      |                               |                           |               |     |    |                 |                  |   |    |
|----------------------------------------------------------------------------------------------------------------------------------------------------------|----------------------|-------------------------------|---------------------------|---------------|-----|----|-----------------|------------------|---|----|
| ZnSiF <sub>6</sub> PW <sub>12</sub><br>(0.005mmol)                                                                                                       | BA<br>(1mmol)        | Air                           | MeCN                      | 320-<br>780nm | R.T | 11 | 67              | 85               | - | 23 |
| PW <sub>12</sub> -PUCNS<br>(20mg)                                                                                                                        | BA<br>(0.1mmol)      | O <sub>2</sub>                | H <sub>2</sub> O          | UV-<br>Vis    | 20  | 2  | 58.3            | 99.5             | - | 24 |
| [Te <sub>2</sub> Mo <sub>12</sub> {Ru(C <sub>6</sub> H <sub>6</sub> )<br>}]/<br>{PW <sub>9</sub> }/ {PMo <sub>12</sub> }/ {S<br>iW <sub>12</sub> } (3mg) | BA<br>(0.5mmol)      | O <sub>2</sub>                | MeCN                      | white<br>LED  | R.T | 24 | 98/91/6<br>5/60 | 96/56/10<br>0/67 | - | 25 |
| CsPbBr <sub>3</sub> /Ni <sub>4</sub> P <sub>2</sub> -<br>0.19 (10mg)                                                                                     | BA<br>(0.05mmol<br>) | O <sub>2</sub>                | MeCN                      | >400nm        | R.T | 6  | 98              | 99               | - | 26 |
| Mg <sub>2</sub> Al-Zn <sub>4</sub> (PW <sub>9</sub> ) <sub>2</sub> /<br>K-Zn <sub>4</sub> (PW <sub>9</sub> ) <sub>2</sub><br>(0.01mmol)                  | BA<br>(1mmol)        | H <sub>2</sub> O <sub>2</sub> | MeCN                      | -             | 60  | 6  | 95/ 100         | 13/<br>92        | - | 27 |
| HPW/AC-COIMI-<br>HPW(5) (30mg)                                                                                                                           | BA<br>(4mmol)        | H <sub>2</sub> O <sub>2</sub> | MeCN/<br>H <sub>2</sub> O | -             | 90  | 6  | 58.6/<br>91.3   | 70.1/<br>90.4    | - | 28 |
| (TBA) <sub>3</sub> PMoV <sub>2</sub><br>(100mg)                                                                                                          | BA<br>(0.01mol)      | O <sub>2</sub>                | MeCN/<br>H <sub>2</sub> O | -             | 170 | 4  | 93              | >99              | - | 29 |
| [TMGHA] <sub>2</sub> .4H <sub>0.6</sub> P<br>W (0.03mmol)                                                                                                | BA<br>(10mmol)       | H <sub>2</sub> O <sub>2</sub> | MeCN                      | -             | 90  | 6  | 69.8            | 91.8             | - | 30 |
| HPW/ILPW/PIPA <sub>1</sub><br>3 (0.13mmol)                                                                                                               | BA<br>(10mmol)       | H <sub>2</sub> O <sub>2</sub> | H <sub>2</sub> O          | -             | 95  | 6  | 48/59/9<br>6    | 67/80/86         | - | 31 |
| NH <sub>2</sub> MIL <sub>88</sub> B(Fe)-<br>PMo <sub>12</sub> (20mg)                                                                                     | BA<br>(1mmol)        | TBHP                          | DMF                       | -             | 100 | 8  | 87              | >99              | - | 32 |
| APMo/49%APMo<br>@Alrp (100mg)                                                                                                                            | BA<br>(4mmol)        | H <sub>2</sub> O <sub>2</sub> | MeCN                      | -             | 80  | 10 | 46/81           | 79/100           | - | 33 |
| Im-PW/GO<br>(600mg)                                                                                                                                      | BA<br>(40mmol)       | H <sub>2</sub> O <sub>2</sub> | H <sub>2</sub> O          | -             | 90  | 7  | 90.1            | 99.2             | - | 34 |
| PMoV <sub>2</sub> @UiO-66-<br>NH <sub>2</sub> (20 mg)                                                                                                    | BA<br>(1mmol)        | H <sub>2</sub> O <sub>2</sub> | solvent-<br>free          | -             | 90  | 4  | 95              | 100              | - | 35 |
| PTA@MMS<br>(5umol)                                                                                                                                       | BA<br>(1mmol)        | H <sub>2</sub> O <sub>2</sub> | MeCN                      | -             | 90  | 15 | 57.3            | 97               | - | 36 |
| {[Cd(bix) <sub>2</sub> ][V <sup>IV</sup> <sub>8</sub> V <sup>V</sup><br>7] <sub>2</sub> } (0.005mmol)                                                    | BA<br>(0.5mmol)      | O <sub>2</sub>                | MeCN                      | -             | 120 | 10 | >99             | 100              | - | 37 |
| [(CH <sub>3</sub> ) <sub>3</sub> NC <sub>12</sub> H <sub>25</sub> ] <sub>2</sub> N<br>a <sub>5</sub> PW <sub>11</sub> O <sub>39</sub><br>(0.2mmol)       | BA<br>(10mmol)       | H <sub>2</sub> O <sub>2</sub> | solvent-<br>free          | -             | 60  | 6  | 78.3            | 75.5             | - | 38 |

**Table S9:** The study of experimental mechanism.<sup>[a]</sup>

| Entry | Substrate                                                                         | Additive         | Light   | Conversions (%) <sup>[b]</sup> | Selectivities (%) <sup>[b]</sup> |
|-------|-----------------------------------------------------------------------------------|------------------|---------|--------------------------------|----------------------------------|
| 1     |  | isopropanol      | AM 1.5G | 87.6                           | 99                               |
| 2     |  | Ammonium oxalate | AM 1.5G | 89.3                           | 99                               |
| 3     |  | 1,4-benzoquinone | AM 1.5G | 67.3                           | 99                               |

[a] Reaction conditions: Mo<sub>42</sub>Ti<sub>12</sub> (**1**) (0.3 mol%), benzaldehyde (1 mmol), H<sub>2</sub>O<sub>2</sub> (16.3 mmol), H<sub>2</sub>O (3 mL), T (55 °C), t (12 h).

[b] Conversion and Selectivity were calculated from gas chromatography.

**Table S10:** Recycling experiments of catalyst.<sup>[a]</sup>

| Catalysts | Substrate                                                                           | T (°C) | Reaction time (h) | Run time | Conversions (%) <sup>[b]</sup> | Selectivities (%) <sup>[b]</sup> |
|-----------|-------------------------------------------------------------------------------------|--------|-------------------|----------|--------------------------------|----------------------------------|
| 1         |    | 55     | 12                | 1        | 92.6                           | 99                               |
| 1         |   | 55     | 12                | 2        | 92.4                           | 99                               |
| 1         |  | 55     | 12                | 3        | 91.5                           | 99                               |
| 1         |  | 55     | 12                | 4        | 91.2                           | 99                               |
| 1         |  | 55     | 12                | 5        | 90.2                           | 99                               |

[a] Reaction conditions: Mo<sub>42</sub>Ti<sub>12</sub> (**1**) (0.3 mol%), benzaldehyde (1 mmol), H<sub>2</sub>O<sub>2</sub> (16.3 mmol), H<sub>2</sub>O (3 mL), T (55 °C), t (12 h).

[b] Conversion and Selectivity were calculated from gas chromatography.

## Section S5 References

1. D. Leggas, O. V. Tsodikov, Determination of small crystal structures from a minimum set of diffraction intensities by homotopy continuation, *Acta Cryst. A.*, 2015, **71**, 319-324.
2. A. Spek, PLATON SQUEEZE: a tool for the calculation of the disordered solvent contribution to the calculated structure factors, *Acta Cryst. C.*, 2015, **71**, 9-18.
3. A. Spek, Structure validation in chemical crystallography, *Acta Cryst. D.*, 2009, **65**, 148-155.
4. I. D. Brown, D. Altermatt, Bond-valence parameters obtained from a systematic analysis of the Inorganic Crystal Structure Database, *Acta Crystallogr. Sect. B.*, 1985, **41**, 244.
5. N. E. Brese, M. O'Keeffe, Bond-valence parameters for solids, *Acta Crystallogr. Sect. B.*, 1991, **47**, 192.
6. C. Wang, C. Liu, L. J. Li, Z. M. Sun, Synthesis, Crystal Structures, and Photochemical Properties of a Family

- of Heterometallic Titanium Oxo Clusters, *Inorg. Chem.*, 2019, **58**, 6312-6319.
7. Y. C. Yang, Q. X. Liu, Z. H. Zhou, H. L. Wan, Regioselective conversions of H<sub>4</sub>pdta (1,2-propanediaminetetraacetic acid) and H<sub>4</sub>eed3a to their triacetates on peroxotitanates, *Dalton Trans.*, 2019, **48**, 16943.
  8. A. Sundar, S. Bhattacharya, J. Oberstein, X. Ma, B. S. Bassil, T. Nisar, D. H. Taffa, M. Wark, V. Wagner, U. Kortz, Organically Functionalized Mixed-Valent Polyoxo-30-molybdate Wheel and Neutral Tetramolybdenum(V) Oxo Cluster, *Inorg. Chem.*, 2022, **61**, 11524-11528.
  9. H. Uchiyama, D. Puthusseri, J. Grins, D. Gribble, G. A. Seisenbaeva, V. G. Pol, V. G. Kessler, Single-Source Alkoxide Precursor Approach to Titanium Molybdate, TiMoO<sub>5</sub>, and Its Structure, Electrochemical Properties, and Potential as an Anode Material for Alkali Metal Ion Batteries, *Inorg. Chem.*, 2021, **60**, 3593-3603.
  10. H. Akashi a , J. Chen b , H. Hasegawa c , M. Hashimoto d , T. Hashimoto c , T. Sakuraba c , A. Yagasaki, Synthesis and structural characterization of [H<sub>x</sub>Cp\*TiMo<sub>5</sub>O<sub>18</sub>]<sup>(3-x)-</sup> (x=0, 1, 2); new insights into protonation patterns in polyoxometalates, *Polyhedron*, 2003, **22**, 2847-2854.
  11. L. Yang, X. P. Shu, M. Y. Fu, H. Y. Wang, Qi. Y. Zhu, J. Dai, Molybdenum–titanium oxo-cluster, an efficient electrochemical catalyst for the facile preparation of black titanium dioxide film, *Dalton Trans.*, 2020, **49**, 10516-10522.
  12. D. X. Wang, Y. S. Liu, G. J. Chen, F. F. Gao, G. Y. Zhang, G. Wang, C. H. Tung, Y. F. Wang, Ligation of Titanium-oxide and {Mo<sub>2</sub>} Units for Solar CO<sub>2</sub> Storage, *Inorg. Chem.*, 2023, **62**, 21074-21082.
  13. W. Z. Chen, X. F. Yi, J. Zhang, L. Zhang, Heterometallic Mo–Ti oxo clusters with metal–metal bonds: Preparation and visible-light absorption behaviors, *Polyoxometalates*, 2023, **2**, 9140013.
  14. S. Eslava, B. P. R. Goodwill, M. McPartlin, D. S. Wright, Extending the Family of Titanium Heterometallic–oxo–alkoxy Cages, *Inorg. Chem.*, 2011, **50**, 5655-5662.
  15. S. M. Zhang, Y. Wang, Y. Y. Ma, Z. B. Li, J. Du, Z. G. Han, Three-Dimensional Silver-Containing Polyoxotungstate Frameworks for Photocatalytic Aerobic Oxidation of Benzyl Alcohol, *Inorg. Chem.*, 2022, **61**, 20596-20607.
  16. M. C. Shen, Y. Z. Shi, Z. W. Wang, T. K. Wu, L. Hu, L. Wu, Enhanced photocatalytic benzyl alcohol oxidation over Bi<sub>4</sub>Ti<sub>3</sub>O<sub>12</sub> ultrathin nanosheets, *J. Colloid Interface Sci.*, 2022, **608**, 2529-2538.
  17. C. Y. Liu, H. H. Niu, D. X. Wang, Y. S. Liu, A. Said, G. Wang, C. H. Tung, Y. F. Wang, Bi-Doped Ti-Oxide Cluster Photocatalyst with High Performance in the Selective Transformation of Benzyl Alcohols to Benzaldehydes, *Cryst. Growth Des.*, 2023, **23**, 6866-6875.
  18. B. Yang, Z. H. Fu, A. Q. Su, J. L. She, M. K. Chen, S. P. Tang, W. W. Hu, C. Zhang, Y. C. Liu, Influence of tetraalkylammonium cations on quality of decatungstate and its photocatalytic property in visible light-triggered selective oxidation of organic compounds by dioxygens, *Appl. Catal. B Environ. Energy*, 2019, **242**, 249-257.
  19. C. Si, X. L. Liu, T. Zhang, J. B. Xu, J. Li, J. Y. Fu, Q. X. Han, Constructing a Photocatalyst for Selective Oxidation of Benzyl Alcohol to Benzaldehyde by Photo-Fenton-like Catalysis, *Inorg. Chem.*, 2023, **62**, 4210-4219.

20. F. S. Xing, R. Y. Zeng, C. C. Cheng, Q. W. Liu, C. J. Huang, POM-incorporated ZnIn<sub>2</sub>S<sub>4</sub> Z-scheme dual-functional photocatalysts for cooperative benzyl alcohol oxidation and H<sub>2</sub> evolution in aqueous solution, *Appl. Catal. B Environ. Energy*, 2022, **306**, 121087.
21. S. Ru, C. C. Zhao, Z. K. Wu, L. K. Yan, D. J. Zang, Y. G. Wei, Molecular Photocatalysts Based on Quinolinium-Grafted Polyoxometalates for Efficient One-Step Aerobic Oxidation of Benzyl Alcohols to Benzoic Acids, *ACS Sustainable Chem. Eng.*, doi.org/10.1021/acssuschemeng.3c05573.
22. Q. X. Gu, X. L. Zhao, M. Meng, Z. Y. Shao, Q. Zheng, W. M. Xuan, Crystalline porous ionic salts assembled from polyoxometalates and cationic capsule for the selective photocatalytic aerobic oxidation of aromatic alcohols to aldehydes, *Chin. Chem. Lett.*, 2023, **34**, 107444.
23. J. Z. Liao, H. L. Zhang, S. S. Wang, J. P. Yong, X. Y. Wu, R. M. Yu, C. Z. Lu, Multifunctional Radical-Doped Polyoxometalate-Based Host–Guest Material: Photochromism and Photocatalytic Activity, *Inorg. Chem.*, 2015, **54**, 4345-4350.
24. L. F. Wu, S. An, Y. F. Song, Heteropolyacids-Immobilized Graphitic Carbon Nitride: Highly Efficient Photo-Oxidation of Benzyl Alcohol in the Aqueous Phase, *Engineering*, 2021, **7**, 94-402.
25. W. Tang, Y. N. Liu, Y. Z. Jin, W. X. Shi, J. L. Sun, P. T. Ma, J. Y. Niu, J. P. Wang, {Ru(C<sub>6</sub>H<sub>6</sub>)}-Decorating Heteropolymolybdate for Highly Activity Photocatalytic Oxidation of Benzyl Alcohol to Benzaldehyde, *Chem. Eur. J.*, 2024, **30**, e202302921.
26. Y. Y. Dong, Y. Q. Feng, Z. Li, H. Zhou, H. J. Lv, G. Y. Yang, CsPbBr<sub>3</sub>/Polyoxometalate Composites for Selective Photocatalytic Oxidation of Benzyl Alcohol, *ACS Catal.*, 2023, **13**, 14346-14355.
27. K. Liu, Y. Q. Xu, Z. X. Yao, H. N. Miras, Y. F. Song, Polyoxometalate-Intercalated Layered Double Hydroxides as Efficient and Recyclable Bifunctional Catalysts for Cascade Reactions, *ChemCatChem.*, 2016, **8**, 929-937.
28. M. Zheng, H. T. He, X. Z. Li, D. L. Yin, Imidazolized Activated Carbon Anchoring Phosphotungstic Acid as a Recyclable Catalyst for Oxidation of Alcohols With Aqueous Hydrogen Peroxide, *Front. Chem.*, 2022, **10**, 925622.
29. J. Díaz, L. R. Pizzio, G. Pecchi, C. H. Campos, L. Azócar, R. Briones, R. Romero, A. Henríquez, E. M. Gaigneaux, D. Contreras, Tetrabutyl Ammonium Salts of Keggin-Type Vanadium-Substituted Phosphomolybdates and Phosphotungstates for Selective Aerobic Catalytic Oxidation of Benzyl Alcohol, *Catalysts*, 2022, **12**, 507.
30. G. J. Chen, Y. Zhou, Z. Y. Long, X. C. Wang, J. Li, J. Wang, Mesoporous Polyoxometalate-Based Ionic Hybrid As a Triphasic Catalyst for Oxidation of Benzyl Alcohol with H<sub>2</sub>O<sub>2</sub> on Water, *ACS Appl. Mater. Interfaces*, 2014, **6**, 4438-4446.
31. P. B. Hao, M. J. Zhang, W. Zhang, Z. Y. Tang, N. Luo, R. Tan, D. H. Yin, Polyoxometalate-based Gemini ionic catalysts for selective oxidation of benzyl alcohol with hydrogen peroxide in water, *Catal. Sci. Technol.*, 2018, **8**, 4463-4473.
32. M. Mohammadikish, M. Panahi, An Fe-MOF–Mo-POM hybrid material: a novel and efficient catalyst for selective benzyl alcohol oxidation to benzaldehyde, *CrystEngComm.*, 2023, **25**, 5470-5478.

33. L. H. Wang, S. X. Ma, C. H. Chen, B. Lu, Z. Wang, Y. Wang, S. J. Mao, Pentacoordinated Al<sup>3+</sup> stabilized polyoxometalates for the efficient catalytic valorization of biomass-derived feedstocks, *Catal. Sci. Technol.*, 2023, **13**, 3558-3567.
34. W. H. Zhang, J. J. Shen, J. Wu, X. Y. Liang, J. Xu, P. Liu, B. Xue, Y. X. Li, An amphiphilic graphene oxide-immobilized polyoxometalate-based ionic liquid: A highly efficient triphase transfer catalyst for the selective oxidation of alcohols with aqueous H<sub>2</sub>O<sub>2</sub>, *Mol. Catal.*, 2017, **443**, 262-269.
35. K. M. Ahmed, K. Amani, A novel amine-functionalized polyoxometalate-based metal-organic framework: A reusable heterogeneous nanocomposite for selective oxidation of alcohols, *J. Mol. Struct.*, 2024, **1303**, 137503.
36. R. Chilivery, V. Chaitanya, J. Nayak, S. Seth, R. K. Rana, Heterogenization of Phosphotungstate Clusters into Magnetic Microspheres: Catalyst for Selective Oxidation of Alcohol in Water, *ACS Sustainable Chem. Eng.*, 2022, **10**, 6925-6933.
37. H. R. Tian, R. H. Li, J. Miao, S. X. Liu, F. F. Wang, Z. P. Zheng, Additive-free selective oxidation of aromatic alcohols with molecular oxygen catalyzed by a mixed-valence polyoxovanadate-based metal-organic framework, *Dalton Trans.*, 2023, **52**, 9121-9130.
38. F. L. Yu, M. X. Liu, B. Yuan, C. X. Xie, S. T. Yu, Selective Oxidation of Primary Alcohols to Carboxylic Acids Using Lacunary Polyoxometalates Catalysts and Hydrogen Peroxide, *Catal. Lett.*, 2023, **153**, 1738-1742.
